# Supplementary figures and images for: Macrophage STING signaling promotes NK cell to suppress colorectal cancer liver metastasis via 4-1BBL/4-1BB co-stimulation
Source: HighWire-hosted journal article supplement (doi:10.1136/jitc-2022-006481), 2023-03-01

**Fig. S3**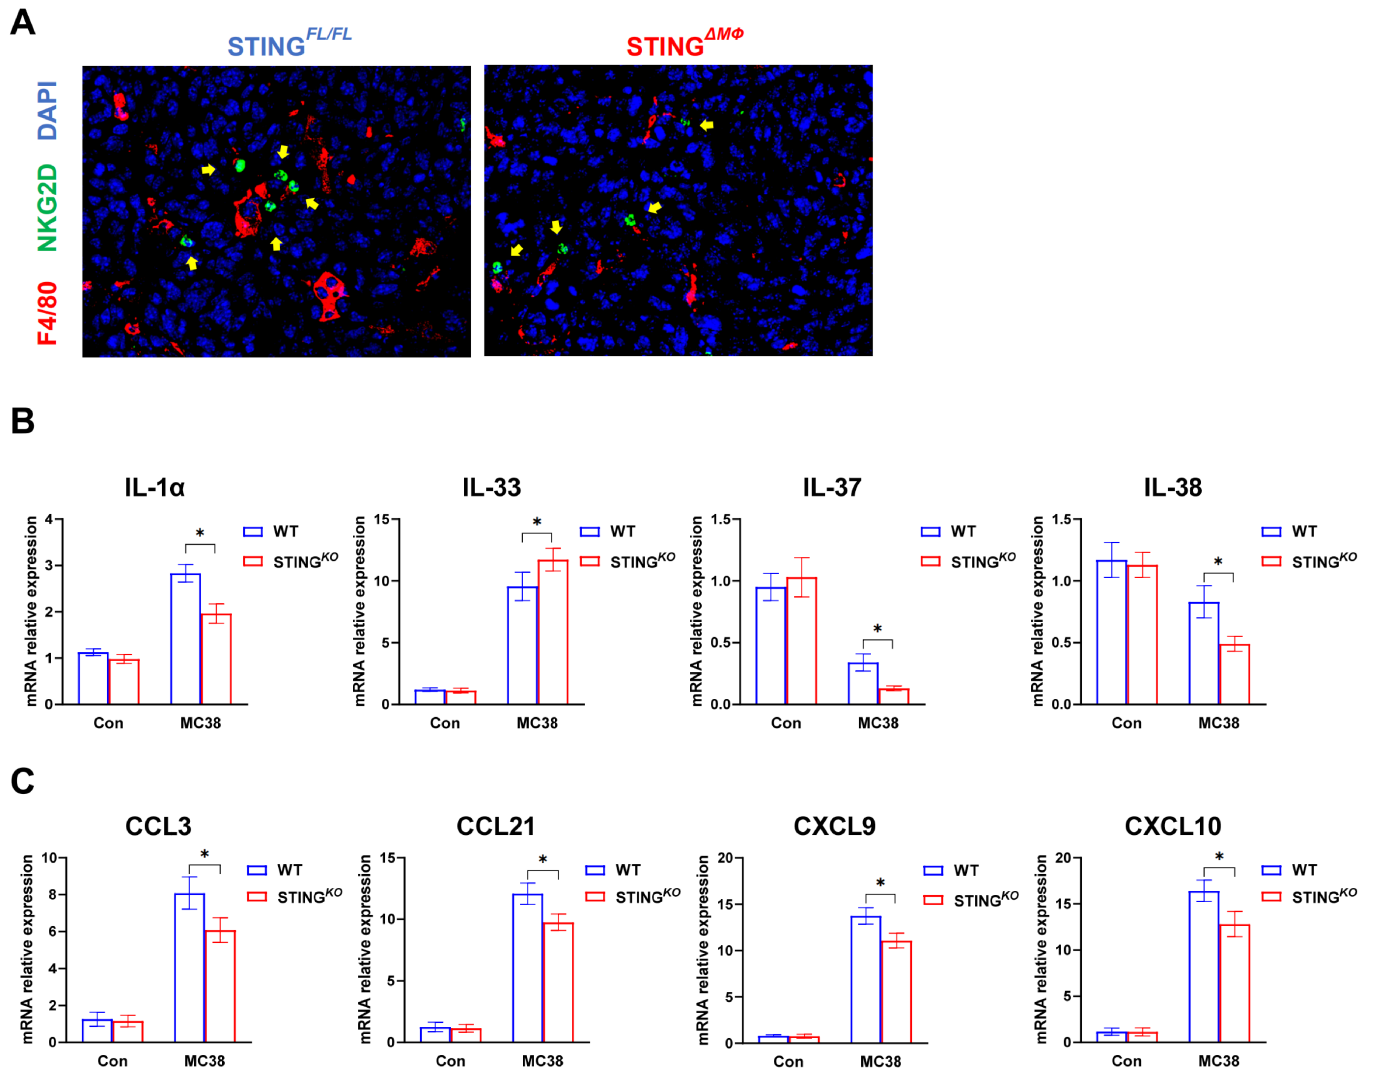

Supplement: jitc-2022-006481supp005_data_supplement.pdf [file jitc-2022-006481supp005_data_supplement.pdf]
